# Supplementary material for: Understanding the monomer deuteration effect on the transition temperature of poly(N-isopropylacrylamide) microgels in H2O
Source: Royal Society of Chemistry journal article supplement (doi:10.1039/d2py01511k), 2023-01-01
Supplement: d2py01511k1.pdf [file d2py01511k1.pdf]

**Supplementary Information:**  
**Understanding the Monomer Deuteration Effect on the Transition Temperature of  
poly(*N*-isopropylacrylamide) Microgels in H<sub>2</sub>O**

Thomas Nevolianis<sup>1</sup>, Andrea Scotti<sup>2</sup>, Alexander V. Petrunin<sup>2</sup>, Walter Richtering<sup>2</sup>, and Kai Leonhard<sup>1</sup>

<sup>1</sup>Institute of Technical Thermodynamics, RWTH Aachen University, 52062 Aachen, Germany, European Union.

<sup>2</sup>Institute of Physical Chemistry, RWTH Aachen University, 52056 Aachen, Germany, European Union.

**Contents**

|   |                                                                                                         |   |
|---|---------------------------------------------------------------------------------------------------------|---|
| 1 | Dynamic Light Scattering and Experimental Analysis                                                      | 2 |
| 2 | Estimation of $\phi_0$ from measurements                                                                | 5 |
| 3 | Coefficient of determination                                                                            | 6 |
| 4 | Derivation of $\Delta\chi_{qc}$ from NIPAM- to D <sub>7</sub> NIPAM-based microgels in H <sub>2</sub> O | 7 |
| 5 | Derivation of $\Delta\chi_{qc}$ for NIPAM-based microgels from H <sub>2</sub> O to D <sub>2</sub> O     | 8 |
| 6 | Zero-point energies                                                                                     | 9 |

# 1 Dynamic Light Scattering and Experimental Analysis

The sigmoid function, similar to<sup>1</sup>, is given by

$$y = A_1 + (A_2 - A_1) \left( \frac{p}{1 + 10^{(\log(x_{01}) - x) / h_1}} + \frac{1 - p}{1 + 10^{(\log(x_{02}) - x) / h_2}} \right) \quad (1)$$

and is fitted against the measurements of the NIPAM- and D<sub>7</sub>NIPAM-based microgels as it is shown in Figure S1. Furthermore, the derivative of the sigmoid function is taken to calculate the VPTT shift. As a result, the VPTT shifts by 4.3 K.

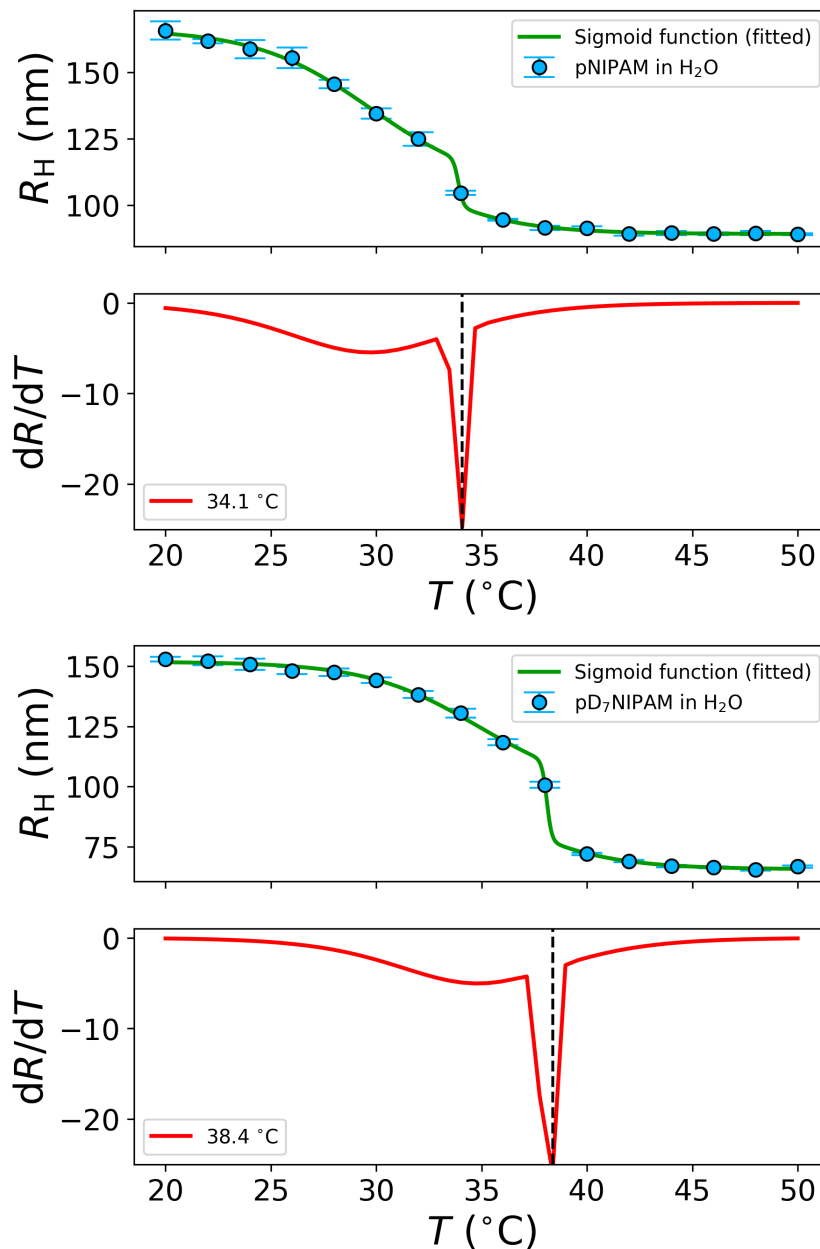

**Figure S1** Experimental hydrodynamic radius  $R_H$  against temperature  $T$  for pNIPAM (top) and pD<sub>7</sub>NIPAM (bottom) microgels in H<sub>2</sub>O, respectively. A sigmoid function is fitted against both experimental measurements and its derivative is taken, resulting to a VPTT shift by 4.3 K.

The sigmoid function is fitted against the measurements of the ULC and pD<sub>3</sub>NIPAM microgels in H<sub>2</sub>O, and pNIPAM microgels in D<sub>2</sub>O as it is shown in Figure S2, S3, and S4, respectively.

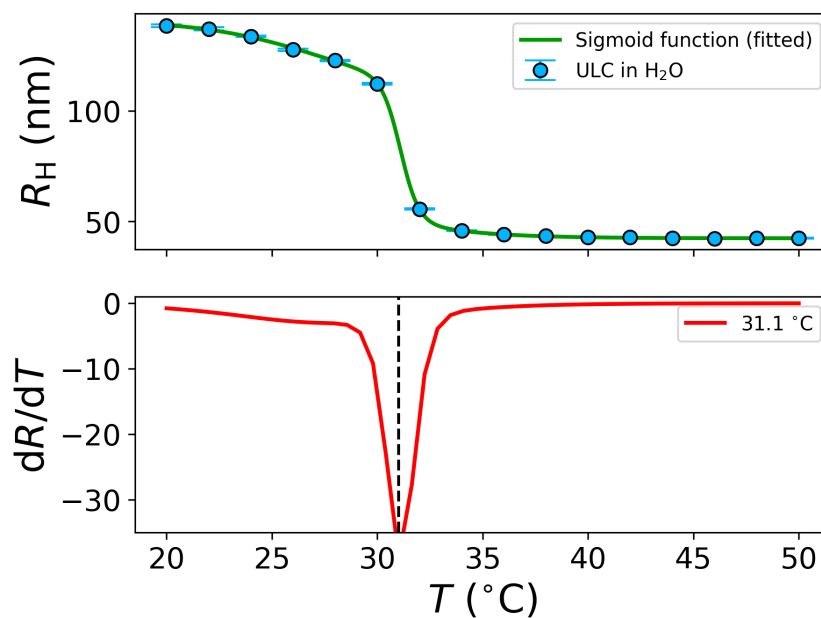

**Figure S2** Experimental hydrodynamic radius  $R_H$  against temperature  $T$  for ULC microgels in  $H_2O$ . A sigmoid function is fitted against both experimental measurements and its derivative is taken, resulting to a VPTT of 31.1 °C.

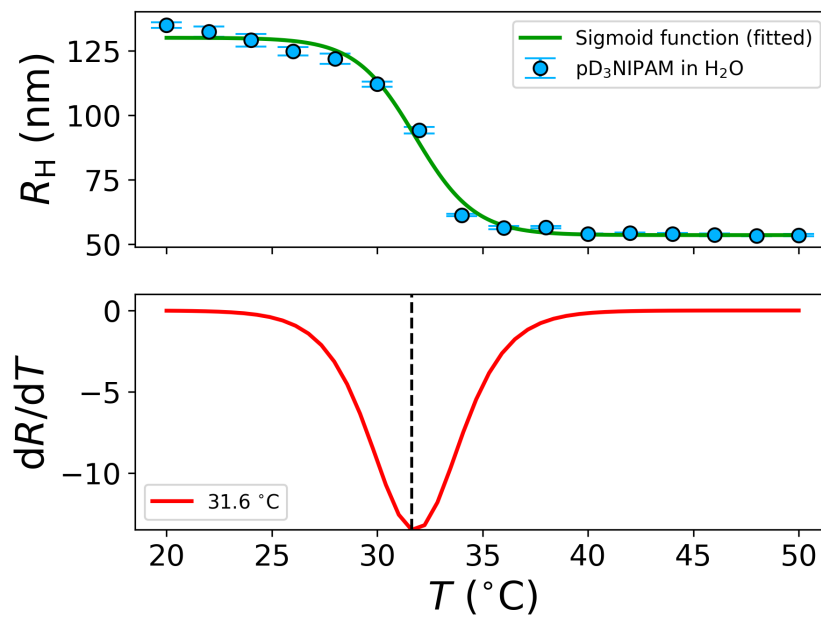

**Figure S3** Experimental hydrodynamic radius  $R_H$  against temperature  $T$  for pD<sub>3</sub>NIPAM microgels in  $H_2O$ . A sigmoid function is fitted against both experimental measurements and its derivative is taken, resulting to a VPTT of 31.6 °C.

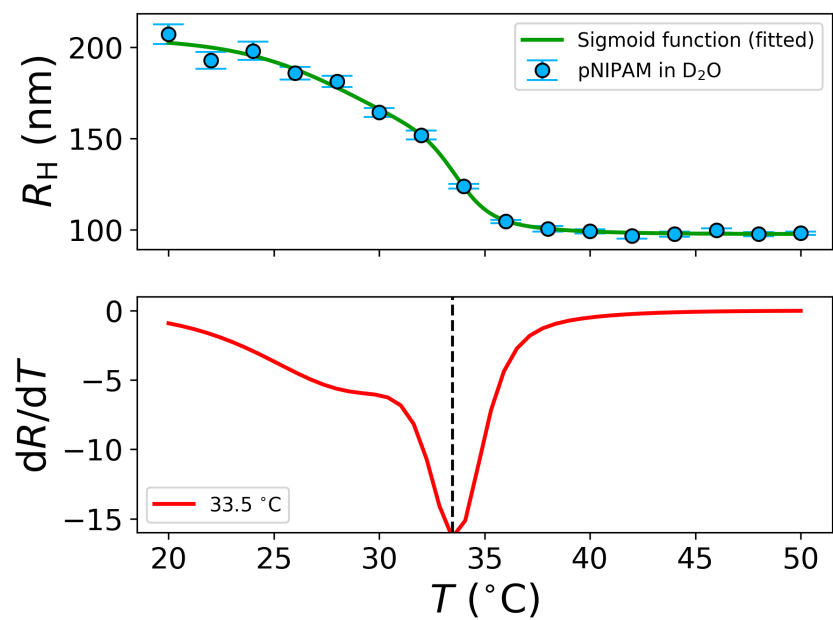

**Figure S4** Experimental hydrodynamic radius  $R_H$  against temperature  $T$  for pNIPAM microgels in  $D_2O$ . A sigmoid function is fitted against both experimental measurements and its derivative is taken, resulting to a VPTT of 33.5°C.

## 2 Estimation of $\phi_0$ from measurements

The volume polymer fraction at the microgel preparation conditions is approximated by

$$\phi_0 = \frac{q}{k}, \quad (2)$$

where  $k = 11.2$  is the conversion constant from viscosimetry and  $q$  is the swelling ratio is given by

$$q = \frac{R_h(20^\circ C)}{R_h(50^\circ C)}. \quad (3)$$

Using the above equations and error propagation analysis, we find  $\phi_0 = 0.58 \pm 0.06$  and  $\phi_0 = 0.51 \pm 0.03$  for the pNIPAM and pD<sub>7</sub>NIPAM microgels, respectively.

### 3 Coefficient of determination

If  $y_i$ ,  $\bar{y}$ , and  $f_i$  are the experimental data, the mean of the experimental data, and the calculated data, respectively, then the coefficient of determination is defined as,

$$R^2 = 1 - \frac{SS_{res}}{SS_{tot}} \quad (4)$$

where the residual sum of squares  $SS_{res}$  is defined as,

$$SS_{res} = \sum_i (y_i - f_i)^2 \quad (5)$$

and the total sum of squares  $SS_{res}$  is defined as,

$$SS_{res} = \sum_i (y_i - \bar{y})^2 \quad (6)$$

#### 4 Derivation of $\Delta\chi_{qc}$ from NIPAM- to D<sub>7</sub>NIPAM-based microgels in H<sub>2</sub>O

For simplification, we drop the subscript qc in the following derivation. The change in Flory-Huggins parameter from NIPAM- to D<sub>7</sub>NIPAM-based microgels in H<sub>2</sub>O is defined as,

$$\Delta\chi_{\text{NIPAM},\text{D}_7\text{NIPAM}}^{\text{H}_2\text{O}} = \chi^{\text{D}_7\text{NIPAM}-\text{H}_2\text{O}} - \chi^{\text{NIPAM}-\text{H}_2\text{O}}. \quad (7)$$

To calculate the Flory-Huggins parameters in above equation, we consider the following reactions:

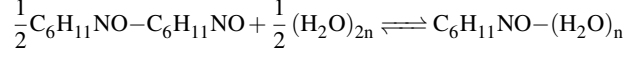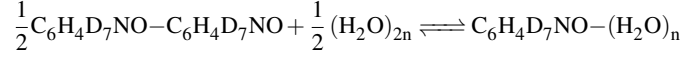

where the C<sub>6</sub>H<sub>11</sub>NO and C<sub>6</sub>H<sub>4</sub>D<sub>7</sub>NO refer to NIPAM and D<sub>7</sub>NIPAM, respectively.

The Flory-Huggins parameters  $\chi^{\text{NIPAM}-\text{H}_2\text{O}}$  and  $\chi^{\text{D}_7\text{NIPAM}-\text{H}_2\text{O}}$  are defined as,

$$\chi^{\text{NIPAM}-\text{H}_2\text{O}} = \frac{\Delta G_{\text{NIPAM}-(\text{H}_2\text{O})_n} - \frac{1}{2}(\Delta G_{\text{NIPAM}-\text{NIPAM}} + \Delta G_{(\text{H}_2\text{O})_{2n}})}{RT} \quad (8)$$

and

$$\chi^{\text{D}_7\text{NIPAM}-\text{H}_2\text{O}} = \frac{\Delta G_{\text{D}_7\text{NIPAM}-(\text{H}_2\text{O})_n} - \frac{1}{2}(\Delta G_{\text{D}_7\text{NIPAM}-\text{D}_7\text{NIPAM}} + \Delta G_{(\text{H}_2\text{O})_{2n}})}{RT}. \quad (9)$$

Finally, combining the equations (7), (8), and (9), the change in Flory-Huggins parameter from NIPAM-based to D<sub>7</sub>NIPAM-based microgels in H<sub>2</sub>O is given by

$$\Delta\chi_{\text{NIPAM},\text{D}_7\text{NIPAM}}^{\text{H}_2\text{O}} = \frac{\Delta G_{\text{D}_7\text{NIPAM}-(\text{H}_2\text{O})_n} - \Delta G_{\text{NIPAM}-(\text{H}_2\text{O})_n} - \frac{1}{2}(\Delta G_{\text{D}_7\text{NIPAM}-\text{D}_7\text{NIPAM}} - \Delta G_{\text{NIPAM}-\text{NIPAM}})}{RT}. \quad (10)$$

We note that we use only the zero-point energies to calculate the  $\Delta\chi_{\text{NIPAM},\text{D}_7\text{NIPAM}}^{\text{H}_2\text{O}}$ , since all other contributions cancel exactly.

## 5 Derivation of $\Delta\chi_{qc}$ for NIPAM-based microgels from $H_2O$ to $D_2O$

For simplification, we drop the subscript qc in the following derivation. We note that for the pNIPAM microgels in  $D_2O$ , the hydrogen of the nitrogen exchanges with the solvent; therefore, this position gets deuterated. We consider the following reactions

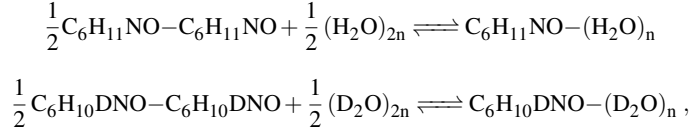

where the  $C_6H_{11}NO$  and  $C_6H_{10}DNO$  refer to NIPAM and  $D_1$ NIPAM when the nitrogen is with hydrogen and deuterium, respectively. To define the change in Flory-Huggins parameter for NIPAM-based microgels from  $H_2O$  to  $D_2O$ , we consider two steps: the change from NIPAM to  $D_1$ NIPAM in  $H_2O$  and of  $D_1$ NIPAM from  $H_2O$  to  $D_2O$ . We note that this is equivalent to the steps: the change of NIPAM from  $H_2O$  to  $D_2O$  and from NIPAM to  $D_1$ NIPAM in  $D_2O$ . Finally, the change in Flory-Huggins parameter for NIPAM-based microgels from  $H_2O$  to  $D_2O$  is defined as,

$$\Delta\chi_{H_2O,D_2O}^{NIPAM} = \frac{\Delta\chi_{NIPAM,D_1NIPAM}^{H_2O} + \Delta\chi_{H_2O,D_2O}^{D_1NIPAM}}{RT} = \frac{(\chi^{D_1NIPAM-H_2O} - \chi^{NIPAM-H_2O}) + (\chi^{D_1NIPAM-D_2O} - \chi^{D_1NIPAM-H_2O})}{RT}, \quad (11)$$

The Flory-Huggins interaction parameters  $\chi^{NIPAM-H_2O}$  and  $\chi^{D_1NIPAM-H_2O}$  are defined as,

$$\chi^{NIPAM-H_2O} = \frac{\Delta G_{NIPAM-(H_2O)_n} - \frac{1}{2}(\Delta G_{NIPAM-NIPAM} + \Delta G_{(H_2O)_{2n}})}{RT} \quad (12)$$

and

$$\chi^{D_1NIPAM-H_2O} = \frac{\Delta G_{D_1NIPAM-(H_2O)_n} - \frac{1}{2}(\Delta G_{D_1NIPAM-D_1NIPAM} + \Delta G_{(H_2O)_{2n}})}{RT}. \quad (13)$$

The change in Flory-Huggins interaction parameter from NIPAM to  $D_1$ NIPAM in  $H_2O$  is given by

$$\Delta\chi_{NIPAM,D_1NIPAM}^{H_2O} = \frac{\Delta G_{D_1NIPAM-(H_2O)_n} - \Delta G_{NIPAM-(H_2O)_n} - \frac{1}{2}(\Delta G_{D_1NIPAM-D_1NIPAM} - \Delta G_{NIPAM-NIPAM})}{RT}. \quad (14)$$

Analogously, the change in Flory-Huggins interaction parameter for  $D_1$ NIPAM from  $H_2O$  to  $D_2O$  is given by

$$\Delta\chi_{H_2O,D_2O}^{D_1NIPAM} = \frac{\Delta G_{D_1NIPAM-(D_2O)_n} - \Delta G_{D_1NIPAM-(H_2O)_n} - \frac{1}{2}(\Delta G_{(D_2O)_{2n}} - \Delta G_{(H_2O)_{2n}})}{RT}. \quad (15)$$

Finally, combining the equations (14) and (15), the change in Flory-Huggins interaction parameter for NIPAM from  $H_2O$  to  $D_2O$  is given by

$$\Delta\chi_{H_2O,D_2O}^{NIPAM} = \frac{\Delta G_{D_1NIPAM-(D_2O)_n} - \Delta G_{NIPAM-(H_2O)_n} - \frac{1}{2}(\Delta G_{(D_2O)_{2n}} - \Delta G_{(H_2O)_{2n}} + \Delta G_{D_1NIPAM-D_1NIPAM} - \Delta G_{NIPAM-NIPAM})}{RT}. \quad (16)$$

A complex of  $(H_2O)_{2n}$  molecules for the  $\Delta G_{SS}$  is required to have the correct stoichiometry. For pD<sub>7</sub>NIPAM microgels in  $H_2O$ , we note this is irrelevant as this term cancels out. We study the effect of one  $D_2O$  molecule to  $\Delta\chi_{qc}$ . We find that  $\Delta\chi_{qc}$  takes the values  $-0.01 (RT)$  and  $0.12 (RT)$  when the  $D_2O$  creates a hydrogen bond with the CO and NH group, respectively. To increase the accuracy of  $\Delta\chi_{qc}$ , one expects that more  $D_2O$  molecules are required to solvate NIPAM (similar to what we find in the pD<sub>7</sub>NIPAM microgels in  $H_2O$ ). However, this is not as trivial as in the case of pD<sub>7</sub>NIPAM microgels in  $H_2O$ ; one realizes that the terms  $(H_2O)_n$  and  $\frac{1}{2}(H_2O)_{2n}$  do not have the same number of hydrogen bonds in both sides of the reaction influencing the  $\Delta\chi_{qc}$  value. Despite our efforts, our approach has yet to be applicable to the pNIPAM microgels in the  $D_2O$  system. A detailed study is required to find a way to deuterate the NIPAM and avoid the effects mentioned above.



## 6 Zero-point energies

**Table S1** Zero-point energies of the molecular structures under study.

| Molecular structures                                          | ZPE (Hartree) |
|---------------------------------------------------------------|---------------|
| NIPAM-NIPAM                                                   | 0.329456      |
| D <sub>7</sub> NIPAM-D <sub>7</sub> NIPAM                     | 0.283613      |
| NIPAM-1H <sub>2</sub> O                                       | 0.188111      |
| NIPAM-2H <sub>2</sub> O                                       | 0.21291       |
| NIPAM-3H <sub>2</sub> O                                       | 0.238955      |
| NIPAM-4H <sub>2</sub> O                                       | 0.265725      |
| NIPAM-5H <sub>2</sub> O                                       | 0.291532      |
| NIPAM-6H <sub>2</sub> O                                       | 0.317277      |
| NIPAM-7H <sub>2</sub> O                                       | 0.34432       |
| NIPAM-8H <sub>2</sub> O                                       | 0.370073      |
| NIPAM-9H <sub>2</sub> O                                       | 0.394123      |
| NIPAM-10H <sub>2</sub> O                                      | 0.422221      |
| NIPAM-14H <sub>2</sub> O                                      | 0.522915      |
| NIPAM-25H <sub>2</sub> O                                      | 0.807         |
| NIPAM-27H <sub>2</sub> O                                      | 0.857955      |
| NIPAM-40H <sub>2</sub> O                                      | 1.194076      |
| D <sub>7</sub> NIPAM-1H <sub>2</sub> O                        | 0.165186      |
| D <sub>7</sub> NIPAM-2H <sub>2</sub> O                        | 0.189985      |
| D <sub>7</sub> NIPAM-3H <sub>2</sub> O                        | 0.21601       |
| D <sub>7</sub> NIPAM-4H <sub>2</sub> O                        | 0.24276       |
| D <sub>7</sub> NIPAM-5H <sub>2</sub> O                        | 0.268569      |
| D <sub>7</sub> NIPAM-6H <sub>2</sub> O                        | 0.294275      |
| D <sub>7</sub> NIPAM-7H <sub>2</sub> O                        | 0.321352      |
| D <sub>7</sub> NIPAM-8H <sub>2</sub> O                        | 0.347109      |
| D <sub>7</sub> NIPAM-9H <sub>2</sub> O                        | 0.371173      |
| D <sub>7</sub> NIPAM-10H <sub>2</sub> O                       | 0.399205      |
| D <sub>7</sub> NIPAM-14H <sub>2</sub> O                       | 0.499785      |
| D <sub>7</sub> NIPAM-25H <sub>2</sub> O                       | 0.783607      |
| D <sub>7</sub> NIPAM-27H <sub>2</sub> O                       | 0.83455       |
| D <sub>7</sub> NIPAM-40H <sub>2</sub> O                       | 1.170671      |
| 1H <sub>2</sub> O                                             | 0.021178      |
| 2H <sub>2</sub> O                                             | 0.045881      |
| 3H <sub>2</sub> O                                             | 0.072951      |
| 4H <sub>2</sub> O                                             | 0.098698      |
| 5H <sub>2</sub> O                                             | 0.124291      |
| 6H <sub>2</sub> O                                             | 0.151048      |
| 7H <sub>2</sub> O                                             | 0.176655      |
| 8H <sub>2</sub> O                                             | 0.204093      |
| 9H <sub>2</sub> O                                             | 0.228877      |
| 10H <sub>2</sub> O                                            | 0.255152      |
| 14H <sub>2</sub> O                                            | 0.356023      |
| 25H <sub>2</sub> O                                            | 0.640694      |
| 27H <sub>2</sub> O                                            | 0.692056      |
| 40H <sub>2</sub> O                                            | 1.029922      |
| 2D <sub>2</sub> O                                             | 0.033493      |
| D <sub>1</sub> NIPAM-1D <sub>2</sub> O                        | 0.177885      |
| D <sub>1</sub> NIPAM-D <sub>1</sub> NIPAM                     | 0.32143       |
| NIPAM-1H <sub>2</sub> O (hydrogen bond with N)                | 0.187161      |
| D <sub>1</sub> NIPAM-1D <sub>2</sub> O (hydrogen bond with N) | 0.177152      |

## References

- [1] M. Cors, L. Wiehemeier, J. Oberdisse and T. Hellweg, *Polymers*, 2019, **11**,
